# Supplementary material for: Functional Status Predicts Acute Care Readmissions from Inpatient Rehabilitation in the Stroke Population
Source: PubMed Central journal article supplement (PMC4657881; doi:10.1371/journal.pone.0142180), 2015-11-23

**S1 Figure. Flow Diagram.**

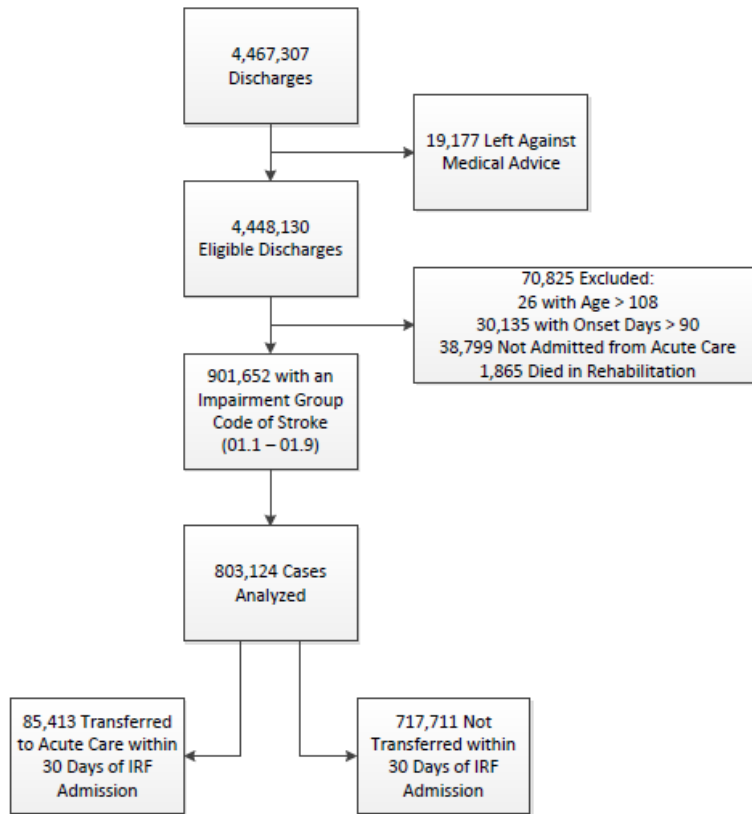

Supplement: pone.0142180.s001.pdf [file pone.0142180.s001.pdf]
